# Supplementary material for: Molecular Genetic Investigation of Digital Melanoma in Dogs
Source: MDPI journal article supplement (doi:10.3390/vetsci9020056), 2022-01-30
Supplement: s1 [file s1]

# Molecular Genetic Investigation of Digital Melanoma in Dogs

David Conrad<sup>1,\*</sup>, Alexandra Kehl<sup>2</sup>, Christoph Beitzinger<sup>2</sup>, Thomas Metzler<sup>3</sup>, Katja Steiger<sup>3</sup>, Nicole Pfarr<sup>3</sup>, Konrad Fischer<sup>4</sup>, Robert Klopffleisch<sup>5</sup> and Heike Aupperle-Lellbach<sup>1</sup>

**Table S1.** Case description, clinical and histomorphological findings of dogs with digital melanoma ( $n = 86$ ).

| Dog No. | Breed   | Age (y) | Sex<br>M: male intact<br>MC: male castrated<br>F: female intact<br>FS: female spayed | Phenotypical haircoat colour | Affected digit<br>RF: right forelimb<br>RH: right hindlimb<br>LF: left forelimb<br>LH: left hindlimb | Affected toe    | Reported metastasis | Degree of pigmentation<br>L: low<br>M: moderate<br>I: intense<br>V: varying | Mitoses/10 HPF | Nuclear atypia<br>MI: mild<br>MO: moderate<br>S: severe | Cell morphology<br>E: epithelioid<br>S: spindle shaped<br>R: round<br>B: balloon<br>M: mixed | Margins<br>C: clean<br>I: infiltrated<br>N: narrow |
|---------|---------|---------|--------------------------------------------------------------------------------------|------------------------------|------------------------------------------------------------------------------------------------------|-----------------|---------------------|-----------------------------------------------------------------------------|----------------|---------------------------------------------------------|----------------------------------------------------------------------------------------------|----------------------------------------------------|
| 1       | Mongrel | 13      | M                                                                                    | black                        | LF                                                                                                   | U               |                     | L                                                                           | 58             | MI                                                      | M                                                                                            | C                                                  |
| 2       | Mongrel | 8       | MC                                                                                   | U                            | RF                                                                                                   | U               |                     | L                                                                           | 25             | MI                                                      | E                                                                                            | C                                                  |
| 3       | Mongrel | 10      | F                                                                                    | U                            | LF                                                                                                   | 2 <sup>nd</sup> | Yes                 | L                                                                           | 15             | MO                                                      | R                                                                                            | C                                                  |
| 4       | Mongrel | 9       | FS                                                                                   | U                            | RF                                                                                                   | 3 <sup>rd</sup> |                     | M                                                                           | 22             | S                                                       | M                                                                                            | I                                                  |
| 5       | Mongrel | 9       | M                                                                                    | U                            | RH                                                                                                   | U               |                     | I                                                                           | 3              | MI                                                      | E                                                                                            | C                                                  |
| 6       | Mongrel | 13      | M                                                                                    | U                            | U                                                                                                    | U               |                     | L                                                                           | 22             | S                                                       | R                                                                                            | C                                                  |
| 7       | Mongrel | 9       | F                                                                                    | black & tan                  | LF                                                                                                   | U               |                     | I                                                                           | 4              | MO                                                      | E                                                                                            | C                                                  |
| 8       | Mongrel | 10      | MC                                                                                   | U                            | RH                                                                                                   | U               |                     | V                                                                           | 9              | MO                                                      | E                                                                                            | C                                                  |
| 9       | Mongrel | 8       | F                                                                                    | black                        | RF                                                                                                   | 5 <sup>th</sup> | Yes                 | L                                                                           | 5              | S                                                       | R                                                                                            | C                                                  |
| 10      | Mongrel | 14      | M                                                                                    | black & tan                  | LF                                                                                                   | 2 <sup>nd</sup> | Yes                 | M                                                                           | 3              | MO                                                      | M                                                                                            | C                                                  |
| 11      | Mongrel | 8       | MC                                                                                   | U                            | RF                                                                                                   | 3 <sup>rd</sup> |                     | I                                                                           | 3              | MI                                                      | E                                                                                            | C                                                  |
| 12      | Mongrel | 13      | FS                                                                                   | black                        | RH                                                                                                   | U               |                     | M                                                                           | 10             | MO                                                      | E                                                                                            | N                                                  |
| 13      | Mongrel | U       | F                                                                                    | black                        | LF                                                                                                   | U               |                     | L                                                                           | 36             | MI                                                      | E                                                                                            | C                                                  |

|    |                    |    |    |             |    |                 |     |   |    |    |   |   |
|----|--------------------|----|----|-------------|----|-----------------|-----|---|----|----|---|---|
| 14 | Mongrel            | 10 | F  | U           | LF | 2 <sup>nd</sup> | Yes | V | 27 | MO | E | C |
| 15 | Mongrel            | 11 | M  | black       | RF | 2 <sup>nd</sup> | Yes | V | 57 | MO | E | C |
| 16 | Mongrel            | 11 | FS | black       | RF | U               |     | L | 5  | MO | S | C |
| 17 | Mongrel            | 12 | MC | U           | LH | U               |     | V | 3  | MO | R | C |
| 18 | Mongrel            | 10 | F  | black       | RF | 3 <sup>rd</sup> |     | L | 12 | MI | S | C |
| 19 | Mongrel            | 11 | FS | black       | RH | U               |     | L | 9  | S  | E | C |
| 20 | Mongrel            | 10 | M  | U           | RH | 5 <sup>th</sup> |     | L | 7  | S  | S | C |
| 21 | Mongrel            | 8  | F  | black       | RF | 3 <sup>rd</sup> |     | L | 15 | MI | R | C |
| 22 | Mongrel            | 15 | M  | black & tan | LH | 5 <sup>th</sup> |     | L | 15 | MO | S | C |
| 23 | Mongrel            | 11 | F  | brown       | RF | U               |     | L | 39 | MO | S | C |
| 24 | Labrador Retriever | 10 | FS | yellow      | RF | 3 <sup>rd</sup> |     | L | 5  | MO | E | C |
| 25 | Labrador Retriever | 12 | M  | brown       | RH | 4 <sup>th</sup> | Yes | L | 13 | S  | E | C |
| 26 | Labrador Retriever | 12 | F  | U           | LF | 3 <sup>rd</sup> | Yes | L | 4  | MO | S | I |
| 27 | Labrador Retriever | 14 | M  | black       | RF | 3 <sup>rd</sup> |     | L | 5  | MO | E | C |
| 28 | Labrador Retriever | 12 | M  | black       | LH | 5 <sup>th</sup> | Yes | L | 9  | MO | E | N |
| 29 | Labrador Retriever | 8  | M  | black       | RH | 4 <sup>th</sup> |     | L | 6  | MO | E | C |
| 30 | Labrador Retriever | 11 | MC | yellow      | LF | U               |     | L | 3  | MI | B | C |
| 31 | Labrador Retriever | 13 | MC | black       | LF | U               | Yes | L | 26 | MI | S | C |
| 32 | Labrador Retriever | 11 | M  | yellow      | LH | U               |     | L | 10 | MO | E | C |
| 33 | Labrador Retriever | 10 | F  | U           | RH | U               | Yes | V | 23 | MO | S | C |
| 34 | Labrador Retriever | 12 | FS | black       | RF | 3 <sup>rd</sup> |     | V | 13 | MO | M | N |

|    |                    |    |    |             |    |                 |     |   |    |    |   |   |
|----|--------------------|----|----|-------------|----|-----------------|-----|---|----|----|---|---|
| 35 | Labrador Retriever | 12 | M  | U           | RF | U               |     | V | 28 | S  | M | C |
| 36 | Labrador Retriever | 12 | M  | brown       | U  | U               | Yes | I | 3  | MI | E | C |
| 37 | Labrador Retriever | 10 | MC | brown       | U  | U               |     | V | 5  | MO | R | C |
| 38 | Labrador Retriever | 14 | FS | brown       | RF | 2 <sup>nd</sup> |     | L | 25 | S  | E | C |
| 39 | Giant Schnauzer    | 8  | M  | black       | LF | 5 <sup>th</sup> | Yes | M | 3  | MO | E | I |
| 40 | Giant Schnauzer    | 11 | MC | black       | RF | U               |     | M | 7  | MO | M | I |
| 41 | Giant Schnauzer    | 9  | M  | black       | RH | 4 <sup>th</sup> |     | L | 34 | MO | E | C |
| 42 | Giant Schnauzer    | 10 | MC | black       | LF | 3 <sup>rd</sup> | Yes | I | 6  | MO | E | I |
| 43 | Giant Schnauzer    | 14 | M  | black       | U  | U               | Yes | V | 21 | S  | E | C |
| 44 | Giant Schnauzer    | 10 | MC | black       | LF | 2 <sup>nd</sup> |     | L | 9  | S  | E | N |
| 45 | Giant Schnauzer    | 7  | FS | black       | RF | 1 <sup>st</sup> |     | M | 5  | MO | E | C |
| 46 | Giant Schnauzer    | 5  | M  | black       | LF | 2 <sup>nd</sup> |     | V | 15 | MI | M | C |
| 47 | Giant Schnauzer    | 6  | MC | black       | RF | 3 <sup>rd</sup> |     | L | 34 | MO | E | C |
| 48 | Giant Schnauzer    | 10 | M  | black       | RH | 5 <sup>th</sup> |     | M | 2  | S  | E | C |
| 49 | Rottweiler         | 8  | F  | black & tan | RF | 1 <sup>st</sup> |     | L | 24 | MO | E | I |
| 50 | Rottweiler         | 5  | F  | black & tan | U  | U               | Yes | L | 65 | S  | E | C |
| 51 | Rottweiler         | 11 | M  | black & tan | LH | 2 <sup>nd</sup> | Yes | L | 15 | S  | E | C |
| 52 | Rottweiler         | 9  | M  | black & tan | RF | 1 <sup>st</sup> |     | L | 37 | S  | E | C |
| 53 | Rottweiler         | 6  | F  | black & tan | RF | 2 <sup>nd</sup> |     | L | 11 | MO | S | C |

|    |                      |    |    |             |    |                 |     |   |    |    |   |   |
|----|----------------------|----|----|-------------|----|-----------------|-----|---|----|----|---|---|
| 54 | Rottweiler           | 12 | U  | black & tan | LF | U               |     | M | 9  | MO | E | C |
| 55 | Rottweiler           | 7  | M  | black & tan | RH | 3 <sup>rd</sup> | Yes | L | 5  | S  | E | N |
| 56 | Golden Retriever     | 8  | M  | yellow      | RF | 1 <sup>st</sup> |     | L | 8  | MO | E | C |
| 57 | Golden Retriever     | 6  | FS | yellow      | RF | 3 <sup>rd</sup> |     | L | 5  | MO | M | C |
| 58 | Golden Retriever     | 12 | F  | yellow      | LH | U               |     | L | 44 | MO | M | C |
| 59 | Golden Retriever     | 15 | FS | yellow      | RF | 5 <sup>th</sup> |     | L | 7  | MI | S | C |
| 60 | Irish Terrier        | 14 | F  | fawn        | RF | U               |     | V | 34 | MO | R | C |
| 61 | Irish Terrier        | 13 | M  | fawn        | LF | U               |     | L | 3  | S  | E | C |
| 62 | Irish Terrier        | 11 | MC | fawn        | RF | 2 <sup>nd</sup> |     | M | 7  | MO | M | N |
| 63 | Sheepdog             | 9  | M  | white       | LF | U               |     | V | 9  | S  | R | C |
| 64 | Sheepdog             | U  | M  | black       | U  | U               | Yes | M | 13 | S  | E | I |
| 65 | Sheepdog             | 11 | FS | white       | LH | 4 <sup>th</sup> | Yes | L | 28 | MO | M | C |
| 66 | Bernese Mountain Dog | 8  | M  | tricolour   | LH | 1 <sup>st</sup> |     | M | 4  | MO | S | C |
| 67 | Bernese Mountain Dog | 11 | FS | tricolour   | RF | 2 <sup>nd</sup> |     | L | 5  | S  | E | C |
| 68 | Cocker Spaniel       | 11 | FS | black       | U  | U               |     | M | 5  | MO | S | C |
| 69 | Cocker Spaniel       | 12 | FS | black       | LF | 3 <sup>rd</sup> |     | L | 53 | S  | M | C |
| 70 | Poodle               | 11 | M  | yellow      | RF | 5 <sup>th</sup> |     | I | 4  | MO | M | C |
| 71 | Poodle               | 12 | F  | U           | U  | U               |     | L | 28 | MI | S | C |
| 72 | Airedale Terrier     | 6  | FS | black & tan | U  | U               |     | L | 6  | MI | S | C |
| 73 | Belgian Shepherd     | 9  | M  | fawn        | LH | 4 <sup>th</sup> |     | L | 13 | MO | E | C |
| 74 | Bullmastiff          | 10 | F  | fawn        | LF | U               |     | V | 54 | MO | E | N |

|    |                        |    |    |             |    |                 |     |   |    |    |   |   |
|----|------------------------|----|----|-------------|----|-----------------|-----|---|----|----|---|---|
| 75 | Cairn Terrier          | 11 | MC | U           | LF | U               |     | V | 7  | MO | E | C |
| 76 | Cane Corso             | 7  | M  | fawn        | LH | 5 <sup>th</sup> | Yes | M | 9  | S  | E | C |
| 77 | Doberman               | U  | F  | black & tan | LF | U               |     | M | 5  | MO | M | C |
| 78 | French Bulldog         | 12 | M  | black       | LF | 4 <sup>th</sup> | Yes | L | 15 | S  | E | C |
| 79 | German Hunting Terrier | 13 | MC | black & tan | LF | 2 <sup>nd</sup> |     | L | 7  | MO | M | C |
| 80 | German Shepherd        | 8  | M  | U           | RF | 3 <sup>rd</sup> |     | M | 31 | S  | M | C |
| 81 | Gordon Setter          | 13 | M  | black & tan | LF | 5 <sup>th</sup> |     | L | 5  | MO | E | I |
| 82 | Havanese               | 15 | M  | black       | LH | 5 <sup>th</sup> |     | L | 23 | MO | R | C |
| 83 | Miniature Schnauzer    | 13 | M  | black       | RF | 1 <sup>st</sup> |     | L | 7  | MO | M | C |
| 84 | Pinscher               | 12 | MC | black & tan | LF | 2 <sup>nd</sup> |     | V | 13 | S  | E | I |
| 85 | Scottish Terrier       | 10 | FS | black       | RH | 1 <sup>st</sup> |     | M | 7  | MO | M | I |
| 86 | Tibetan Terrier        | 11 | M  | U           | RF | 3 <sup>rd</sup> | Yes | M | 4  | MO | E | C |

U: unknown
